# Supplementary material for: A method for near full-length amplification and sequencing for six hepatitis C virus genotypes
Source: PubMed Central journal article supplement (PMC4797172; doi:10.1186/s12864-016-2575-8), 2016-03-17

(kbp) M 1 2 3 4 5 6 7 8 9 10 11 12 13 14 15 16 M

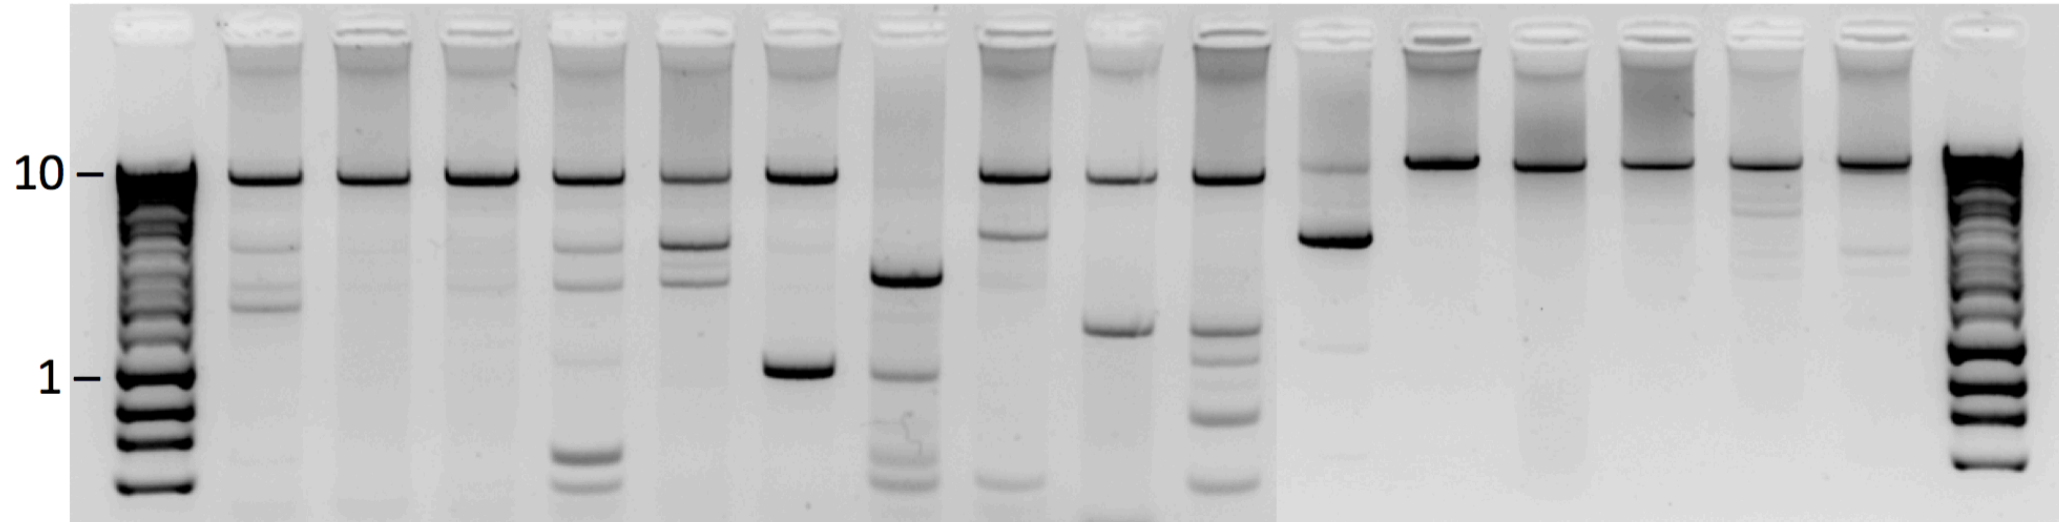

Supplement: 12864_2016_2575_MOESM1_ESM.pdf [file 12864_2016_2575_MOESM1_ESM.pdf]
